# Supplementary material
Source: MDPI journal article supplement (https://www.mdpi.com/2674-0583/2/1/4)
Supplement: s1 [file s1]

**Supplementary Table S1.** The off-target sites for *GRIK1*, *GRIK2*, and *GRIK4* gRNA.

| Target sequence for <i>GRIK1</i> : GGATATAGCAGAGGAAATAGAGG |                      |                                                            |
|------------------------------------------------------------|----------------------|------------------------------------------------------------|
| Location                                                   | Number of mismatches | Sequence (including mismatches)                            |
| chr1:151261259<br>( <i>ZNF687</i> _intron 3)               | 3                    | CCCCTAT <b>c</b> T <b>t</b> C <b>c</b> CTGCTATATCC         |
| chr11:24740548<br>( <i>LUZP2</i> _intron 1)                | 3                    | GG <b>g</b> TATAt <b>a</b> AGAGGAAATAGAGG                  |
| chr11:121289377                                            | 3                    | GGAT <b>g</b> TAGCAGAGGAA <b>c</b> T <b>g</b> GCGG         |
| chr11:134869848                                            | 3                    | GG <b>gg</b> A <b>g</b> AGCAGAGGAAATAGGGG                  |
| chr12:14769329<br>( <i>GUCY2C</i> _intron 25)              | 3                    | GGATAT <b>g</b> GCAGAGGAAAT <b>g</b> <b>c</b> TGG          |
| chr13:48811058<br>( <i>ITM2B</i> _intron 1)                | 3                    | <b>t</b> GATATAG <b>g</b> AGAG <b>a</b> AAATAGTGG          |
| chr14:43133466                                             | 3                    | GG <b>a</b> GAT <b>a</b> <b>c</b> CAGAG <b>t</b> AAATAGGGG |
| chr14:89886352<br>( <i>FOXN3</i> _intron 1)                | 3                    | GGATAT <b>t</b> <b>g</b> AGAGGAAAT <b>a</b> <b>c</b> GGG   |
| chr16:57583416<br>( <i>ADGRG5</i> _intron 1)               | 3                    | CCCCTATTTCTCT <b>t</b> CT <b>t</b> cATCC                   |
| chr16:67968640<br>( <i>PSMB10</i> _intron 7)               | 3                    | CCCCTAT <b>c</b> TCC <b>c</b> CTGCTATAG <b>g</b> CC        |
| chr17:33321885<br>( <i>LIG3</i> _intron 9)                 | 3                    | GGATATAGCAG <b>t</b> GGAAA <b>a</b> <b>a</b> TGG           |
| chr2:121266319                                             | 2                    | CCTC <b>g</b> ATTTCTCTGCTAT <b>a</b> <b>c</b> CC           |
| chr20:12024758                                             | 3                    | CCT <b>t</b> TATTTCTC <b>g</b> GCT <b>c</b> TATCC          |
| chr20:34109882                                             | 3                    | GGATAT <b>a</b> <b>c</b> <b>t</b> GAGGA <b>g</b> TAGAGG    |
| chr22:36536844<br>( <i>APOL3</i> _exon 3)                  | 3                    | CCGCT <b>g</b> TTT <b>c</b> tTCTGCT <b>g</b> TATCC         |
| chr22:49245727                                             | 3                    | GGAT <b>a</b> g <b>a</b> AGAGGAAA <b>c</b> AGTGG           |
| chr3:58054571<br>( <i>FLNB</i> _intron 1)                  | 3                    | GGATATAG <b>a</b> AGAGG <b>c</b> <b>a</b> tTAGAGG          |
| chr3:117677756                                             | 3                    | GGATATAGCAG <b>a</b> <b>g</b> GA <b>c</b> AGGGG            |
| chr4:71771379<br>( <i>MOB1B</i> _intron 1)                 | 3                    | GGAT <b>gg</b> AGCAGAGGAAAT <b>a</b> AGGG                  |
| chr4:77129747<br>( <i>SCARB2</i> _intron 1)                | 3                    | GG <b>a</b> g <b>a</b> AGCAGAGGAAA <b>a</b> AGTGG          |
| chr5:103041128                                             | 3                    | CCACTATTTCT <b>t</b> TG <b>t</b> TATAT <b>C</b> <b>a</b>   |

| chr6:136174586<br>( <i>PDE7B</i> _intron 1)                 | 3                    | CCTC <b>c</b> ATTTCCTCTGCT <b>t</b> TATC <b>t</b>   |
|-------------------------------------------------------------|----------------------|-----------------------------------------------------|
| chr6:147805828                                              | 3                    | GGATAT <b>g</b> GCA <b>a</b> AGGAAAT <b>g</b> GGGG  |
| chr8:26388739<br>( <i>DPYSL2</i> _intron 1)                 | 3                    | GGA <b>a</b> A <b>c</b> AGCAGAGGAAAT <b>t</b> GAGG  |
| chr9:6820589<br>( <i>KDM4C</i> _intron 4)                   | 2                    | GGATATAGCA <b>t</b> AGGAAT <b>t</b> TAGGGG          |
| chr9:18501127<br>( <i>ADAMTSL1</i> _intron 1)               | 3                    | CCTCTATTTCC <b>c</b> CTGCTA <b>g</b> AT <b>g</b> C  |
| chr9:104416811<br>( <i>GRIN3A</i> _intron 3)                | 3                    | CCACT <b>t</b> TTTCCTCT <b>ca</b> TATATCC           |
| Target sequence for <i>GRIK2</i> : GTGGTCGATGGAACGATTGCAGG  |                      |                                                     |
| Location                                                    | Number of mismatches | Sequence (including mismatches)                     |
| There are no off-targets.                                   |                      |                                                     |
| Target sequence for <i>GRIK4</i> : TCGGCCCCAGATCTGGCAGCACGG |                      |                                                     |
| Location                                                    | Number of mismatches | Sequence (including mismatches)                     |
| chr11:118663590                                             | 3                    | CCCTGCT <b>t</b> CCAG <b>c</b> TCTGGGCC <b>a</b> A  |
| chr13:82463674                                              | 3                    | CCAG <b>g</b> GCTGCCAGATCTGGG <b>ga</b> GA          |
| chr14:23851992<br>( <i>MYH6</i> _intron 37)                 | 3                    | CCATGCTGCC <b>c</b> GATCTGGGCC <b>cc</b>            |
| chr15:31779358<br>( <i>OTUD7A</i> _intron 13)               | 3                    | CCCTGCTGCCAG <b>g</b> TCTGG <b>t</b> CC <b>ca</b> A |
| chr17:43324175<br>( <i>FMNL1</i> _intron 26)                | 3                    | CCATGCT <b>c</b> CCAG <b>c</b> TCTGGGC <b>g</b> GA  |
| chr17:81143686                                              | 3                    | CCCTGCTGCCAG <b>ca</b> <b>ca</b> GGGCCGA            |
| chr18:56887029                                              | 3                    | <b>c</b> CGGCCCCAGATC <b>a</b> GGCAGC <b>g</b> GGG  |
| chr20:61287978<br>( <i>SLCO4A1</i> _exon 2)                 | 3                    | CCC <b>ct</b> CTGCCAG <b>c</b> TCTGGGCCGA           |
| chr4:7817520<br>( <i>AFAP1</i> _intron 7)                   | 3                    | TCGGCC <b>a</b> AG <b>g</b> TCTGGCAG <b>g</b> ATGG  |
| chr7:46948287                                               | 3                    | CCATGC <b>a</b> GCCAGATCT <b>t</b> GGCC <b>ca</b> A |
| chrX:12514161<br>( <i>FRMPD4</i> _intron 4)                 | 3                    | CCATGCT <b>a</b> CCAGATCT <b>ca</b> GCCGA           |
| chrX:110478130                                              | 3                    | CCC <b>ct</b> CTGCCAGATCTGGGC <b>a</b> GA           |

Small bold red letters mean mismatch nucleotide.
