# Supplementary material
Source: MDPI journal article supplement (https://www.mdpi.com/2674-0583/2/1/4)
Supplement: s1 [file s1]

**Supplementary Table S9.** Primer sequences, GenBank accession number, optimal annealing temperature, and length of the amplicon of genes as assayed in RT-qPCR.

| Genes         | GenBank No. | Primer Sequences (5' to 3') |                      | Size (bps) | Ta (°C) |
|---------------|-------------|-----------------------------|----------------------|------------|---------|
|               |             | Sense                       | Antisense            |            |         |
| <i>GRIK1</i>  | NM_000830   | ACCCTGATGCCTAACACCAC        | AAGAGAGCAGCCACACCAAG | 116        | 60      |
| <i>GRIK2</i>  | NM_021956   | GATTCAGGTTTGCTGGATGG        | TCATCTGGGGAAACTGTTGA | 100        | 60      |
| <i>GRIK3</i>  | NM_000831   | CGGAGTCTGGTTTGGGAATA        | CGTCCGCATACTCGAAGATT | 115        | 60      |
| <i>GRIK4</i>  | NM_014619   | AGGAATGGTTTTCGGCAGAT        | ACCAGGGTGGTGTGAAGAG  | 110        | 60      |
| <i>GRIK5</i>  | NM_002088   | TGCCAGGTGCTCTCATCACT        | CTCGATGATCCCGTTGATCT | 117        | 60      |
| <i>GRIA2</i>  | NM_000826   | GCTGAAAAACAAATGGTGGT        | CCCCGACAAGGATGTAGAAT | 122        | 60      |
| <i>GRIA4</i>  | NM_000829   | CAATGCTGGTGGCTTTGATA        | TTCTCTCCCACTCCCAGT   | 127        | 60      |
| <i>GABRB3</i> | NM_000814   | AAGGCAGAAGAAGCTTGCAG        | CTTCCAGCGATGTCAACAGA | 110        | 60      |
| <i>GRM8</i>   | NM_000845   | CCACCTGCATCATTTGGTTA        | TGCCCAGAGATACTGAAGCA | 129        | 60      |
| <i>KCNJ3</i>  | NM_002239   | CGAAGCATGCAAACCTGAACA       | AAAACGATGACCCCAAAGAA | 126        | 60      |

Ta, optimal annealing temperature
