# Supplementary material
Source: MDPI journal article supplement (https://www.mdpi.com/2674-0583/2/1/4)
Supplement: s1 [file s1]

(A)

GRIK1p.L25Pfs\*?/WT

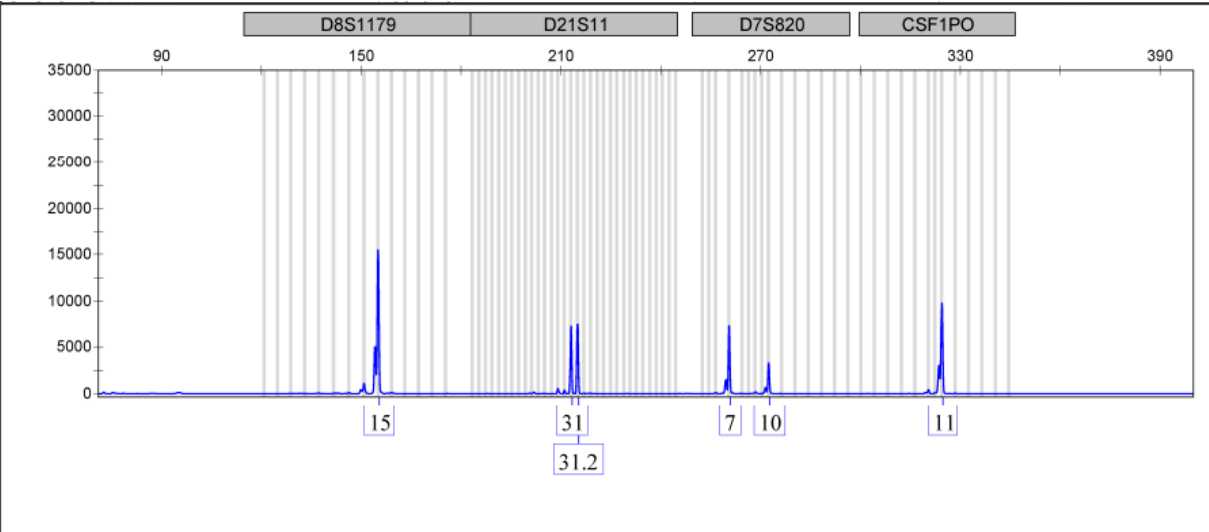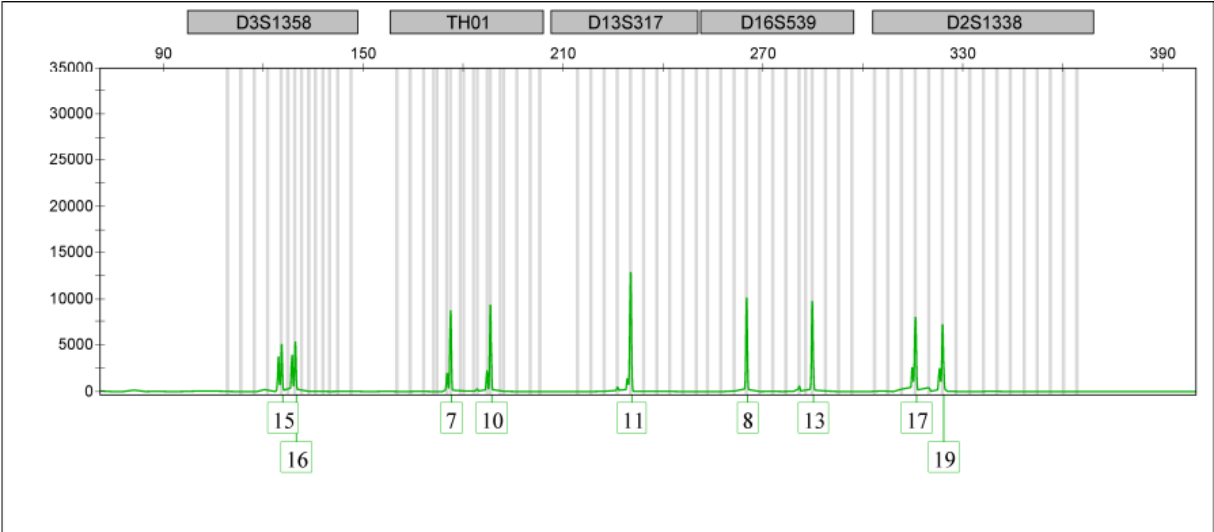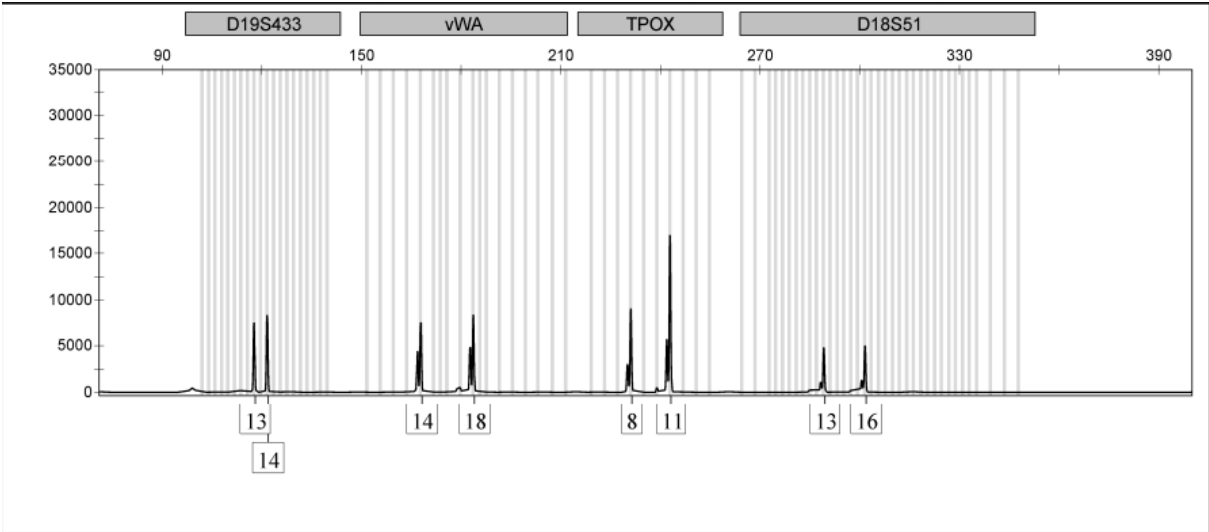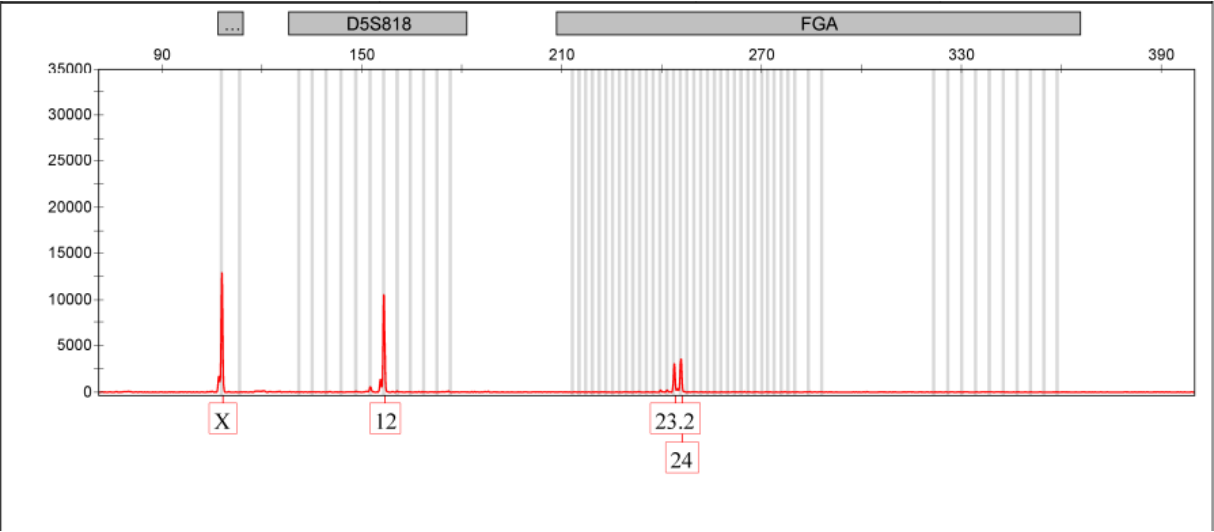

(B)

GRIK1p.L25Pfs\*?/p.L25Pfs\*?

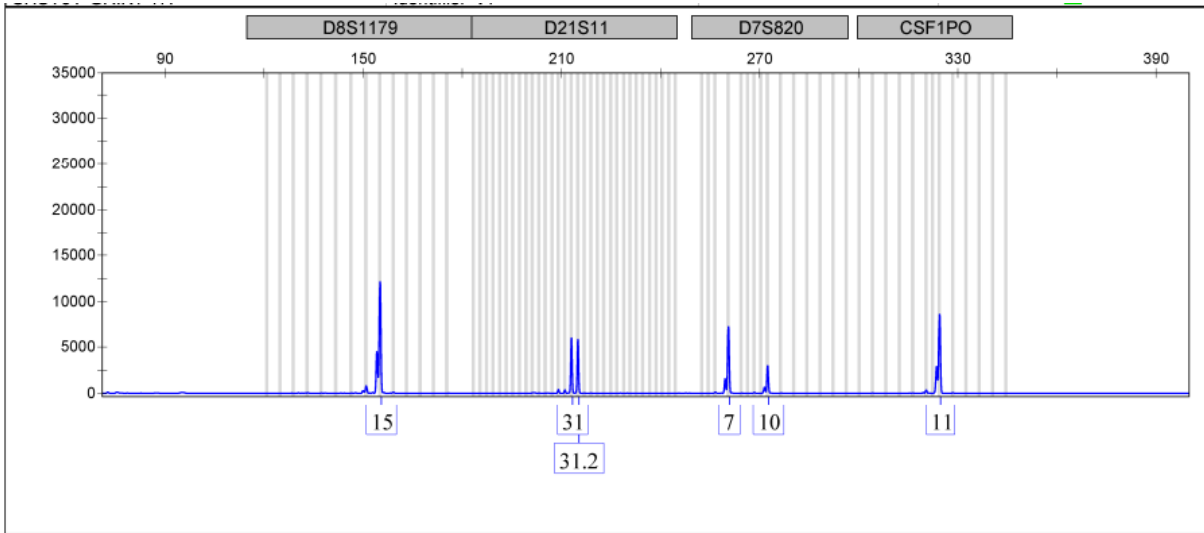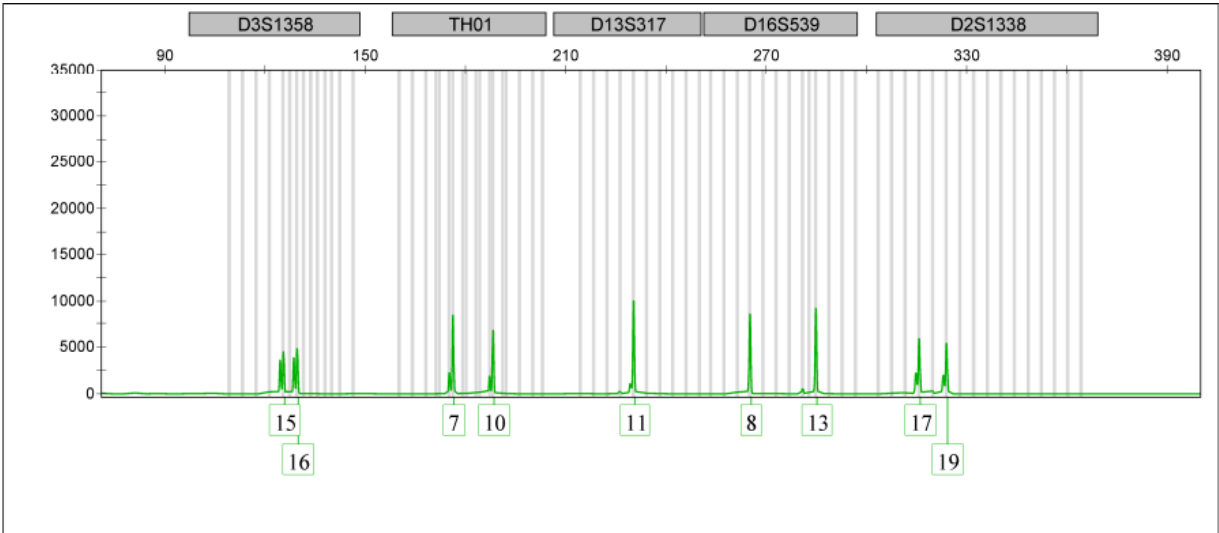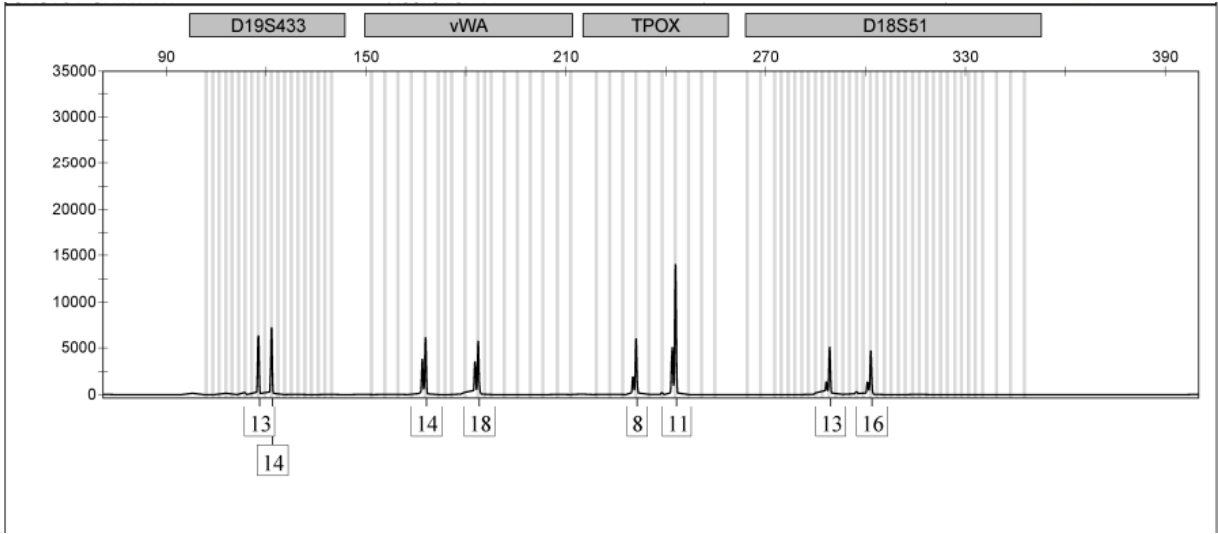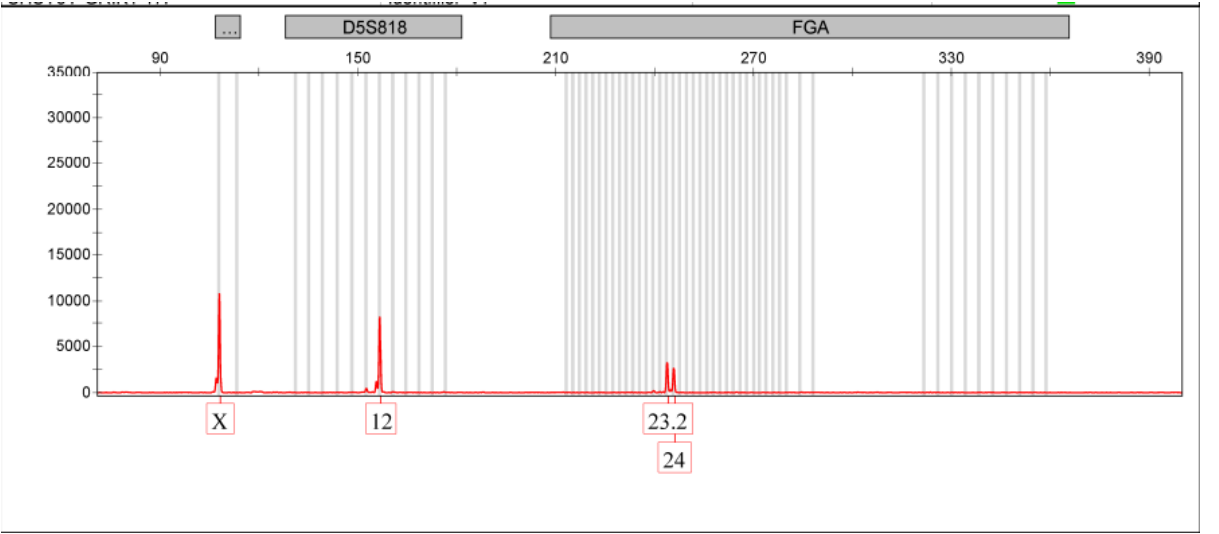

(C)

GRIK2<sup>p.L301Ffs\*/WT</sup>

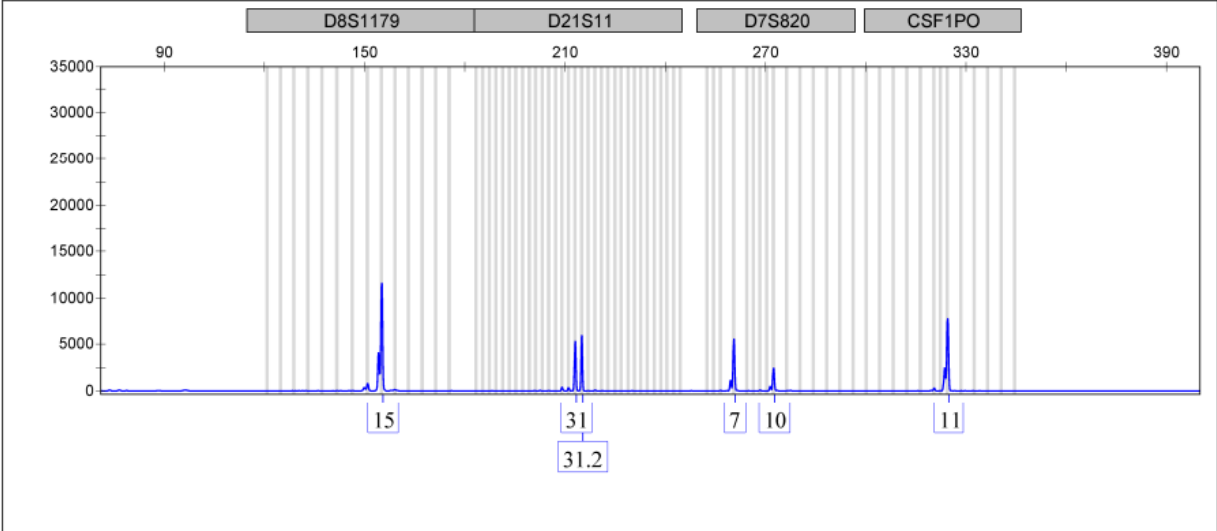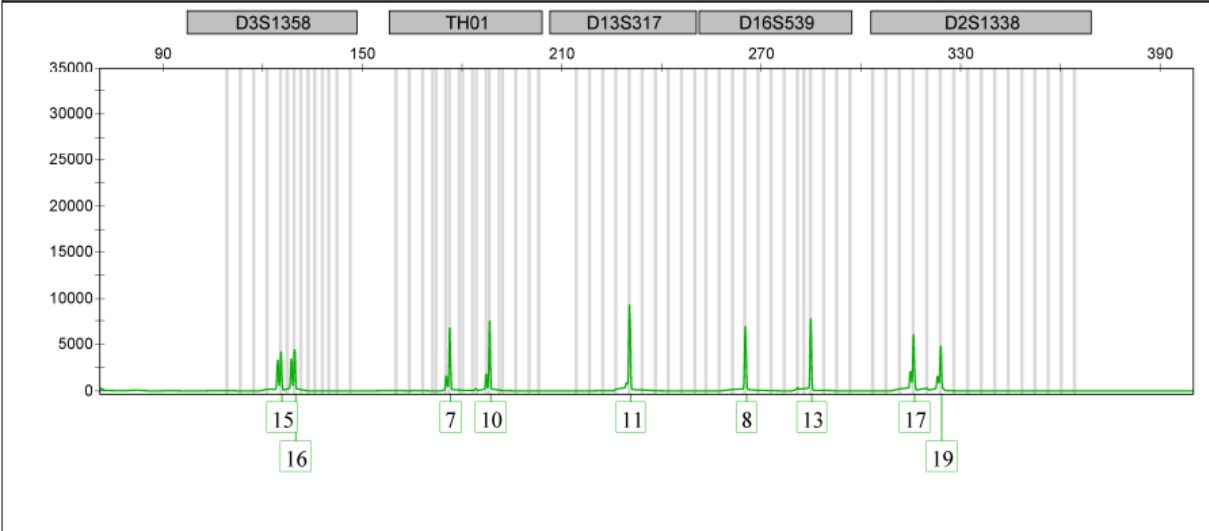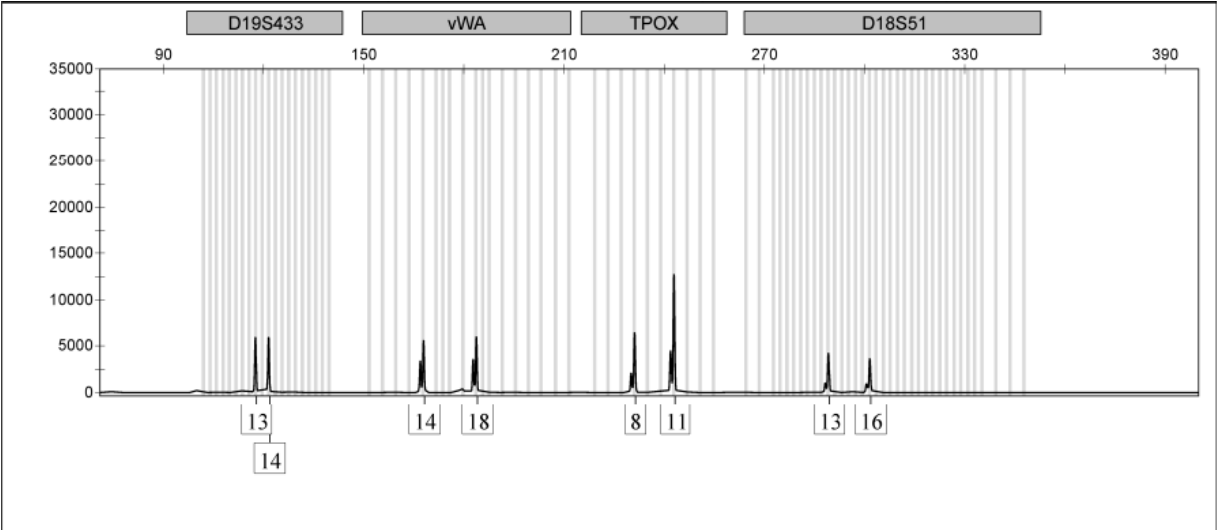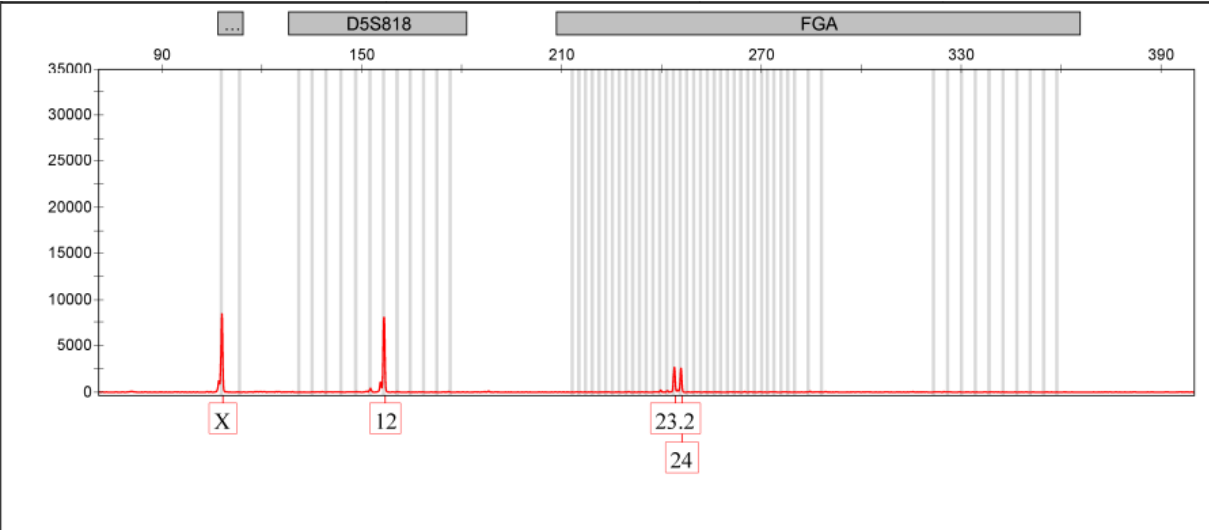

(D)

GRIK2<sup>p.L301Ffs\*?/p.L301Ffs\*?</sup>

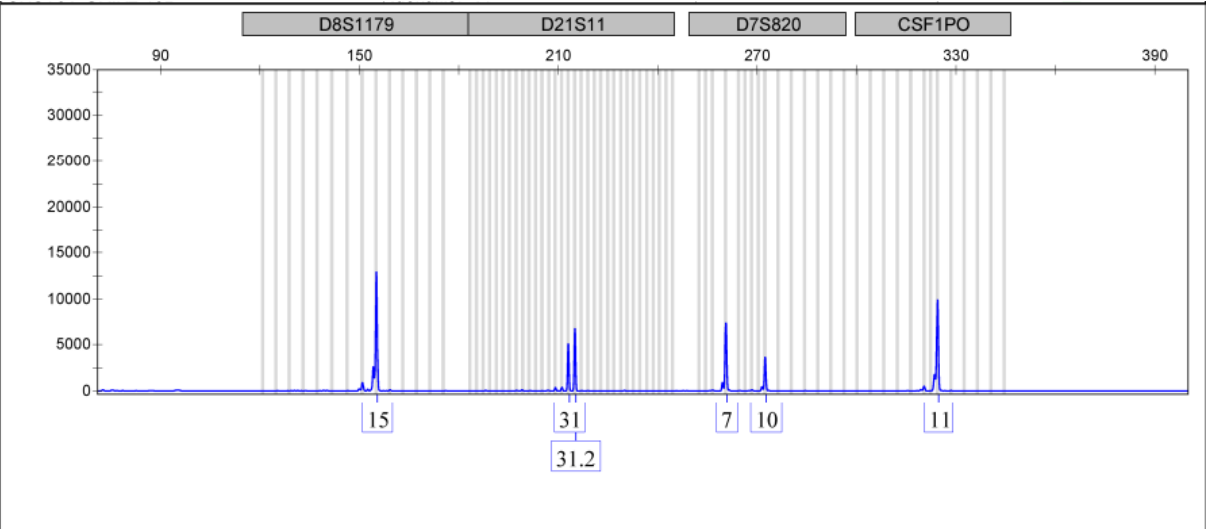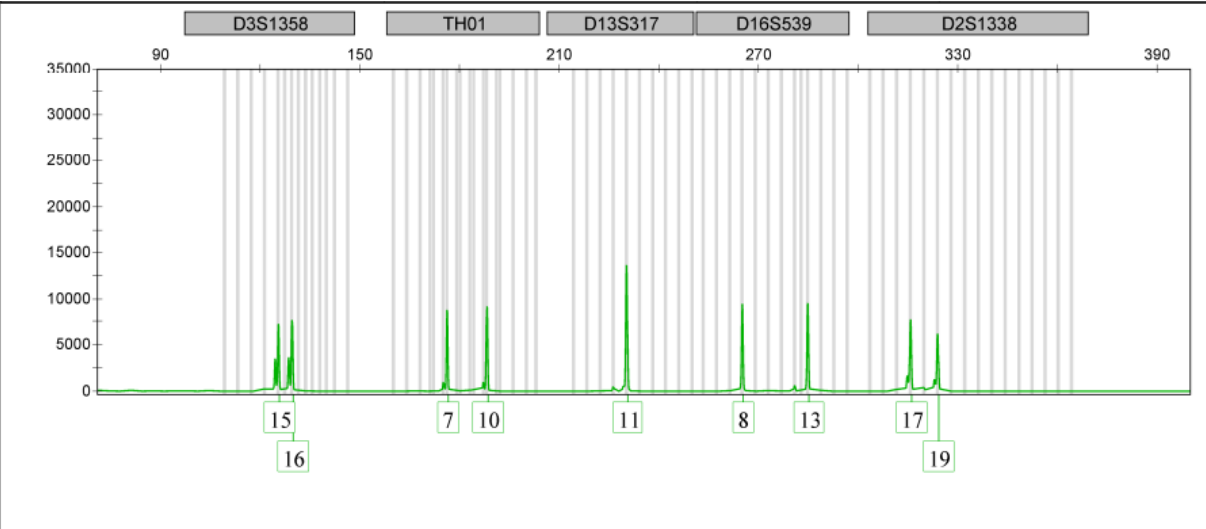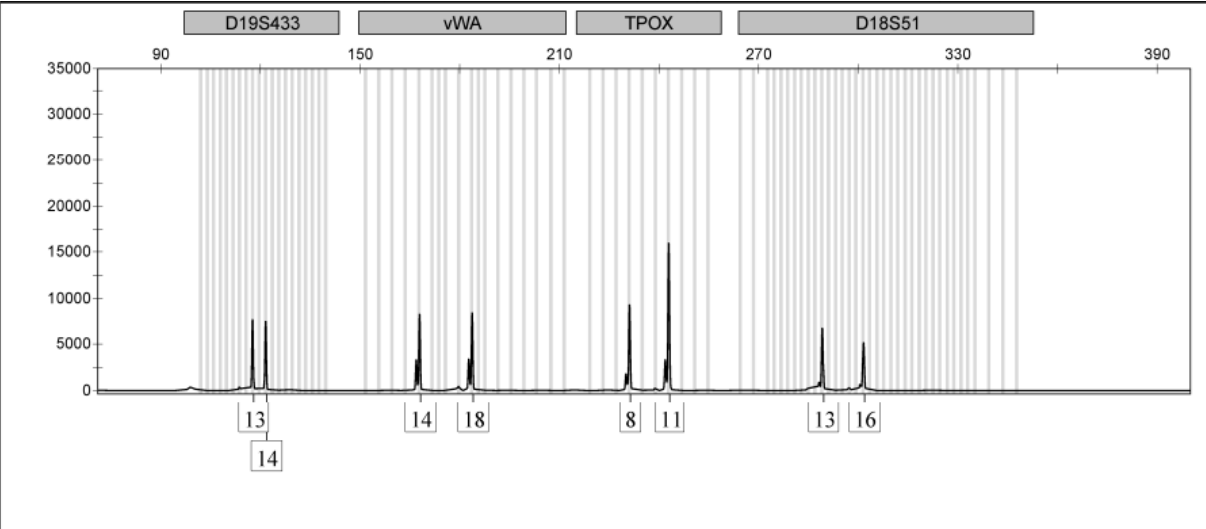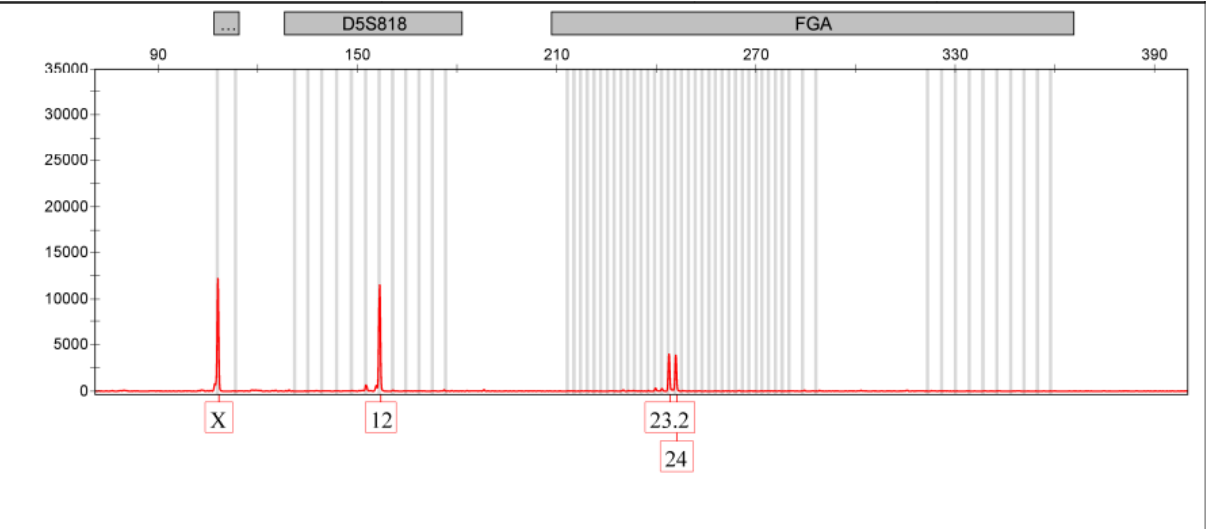

(E)

GRIK4 p.H343Afs\*?/p.H343Afs\*?

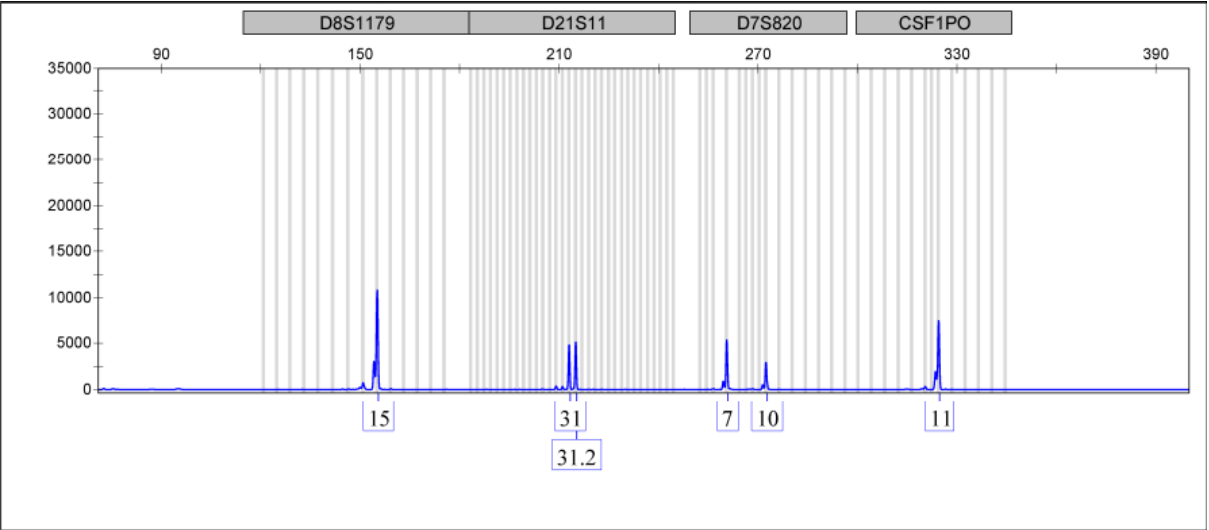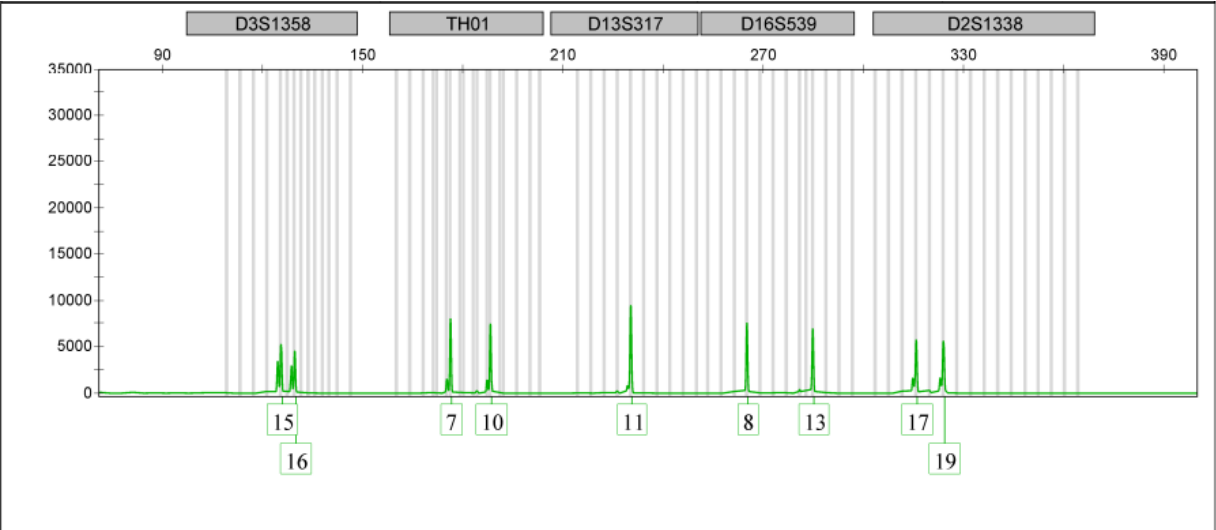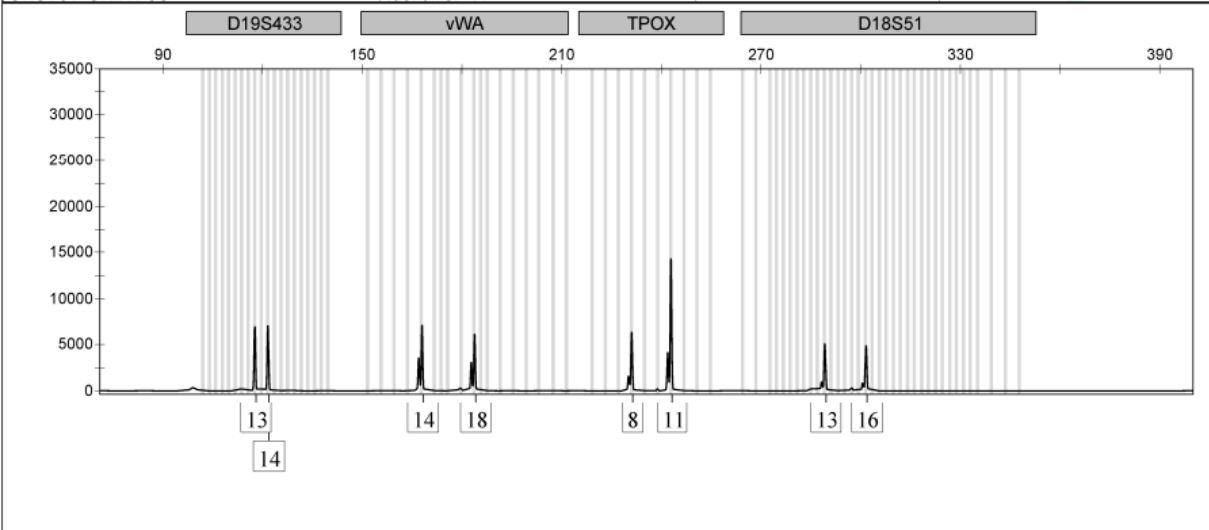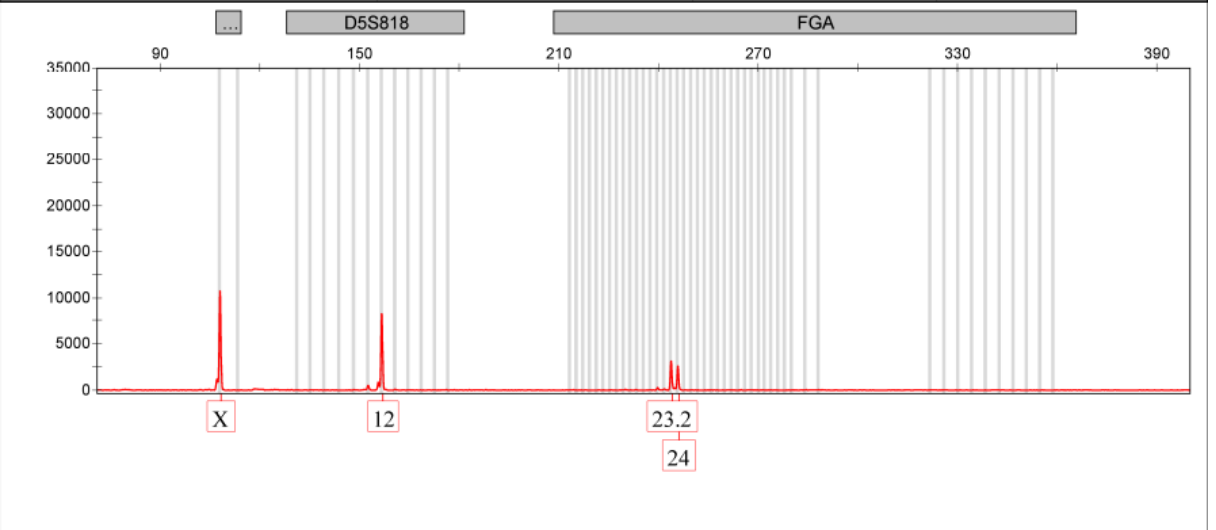

(F)

SH-SY5Y wild-type

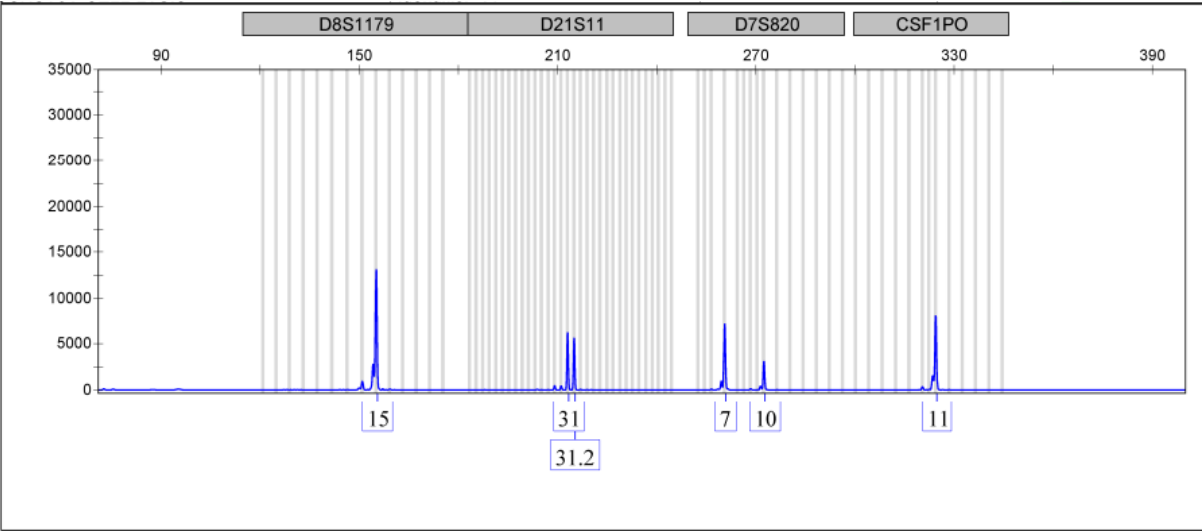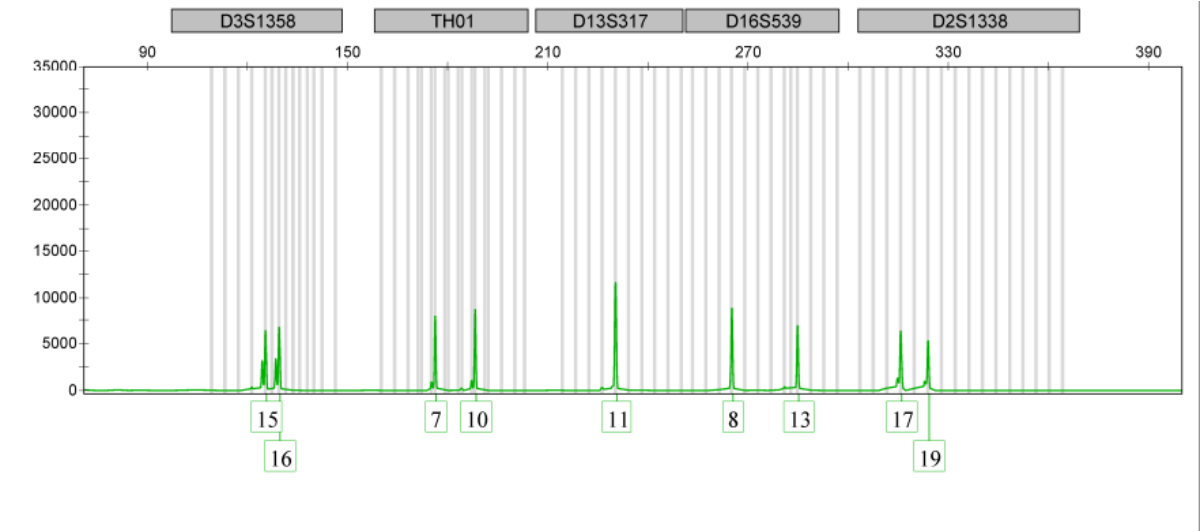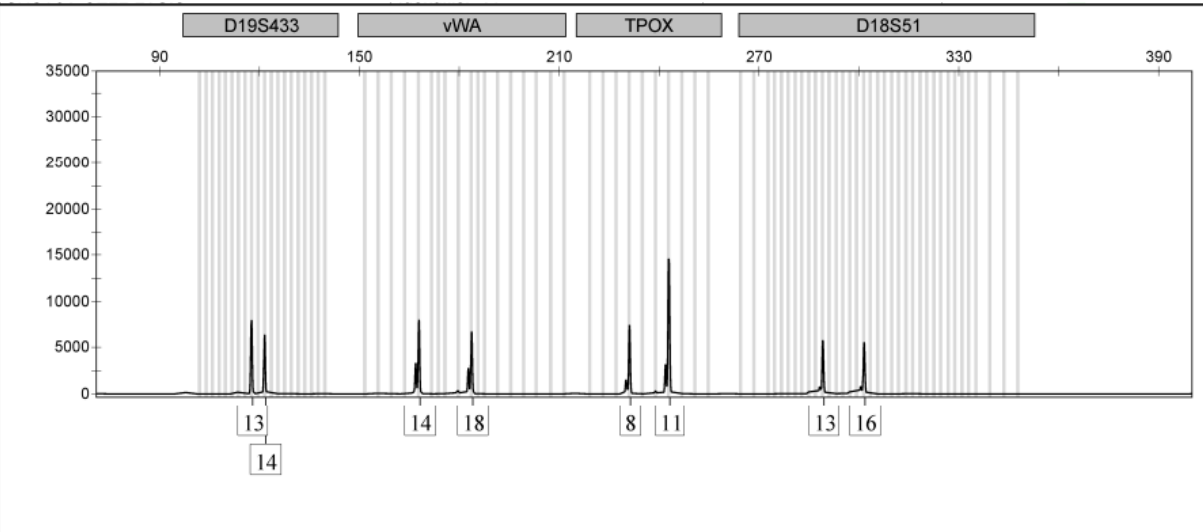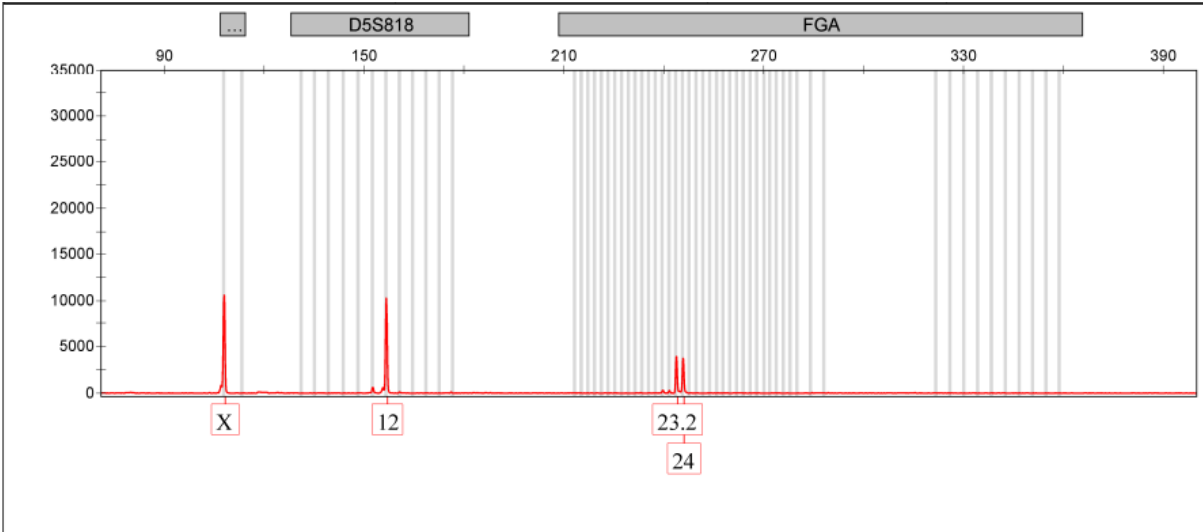

**Supplementary Figure S2.** GeneMapper Software 4 analyzed 16 STR loci among edited cell lines (A, B, C, D, and E) and SH-SY5Y WT cell (F).
