# Supplementary material
Source: MDPI journal article supplement (https://www.mdpi.com/2674-0583/2/1/4)
Supplement: s1 [file s1]

DEG All KEGG Enrichment Pathways Dotplot

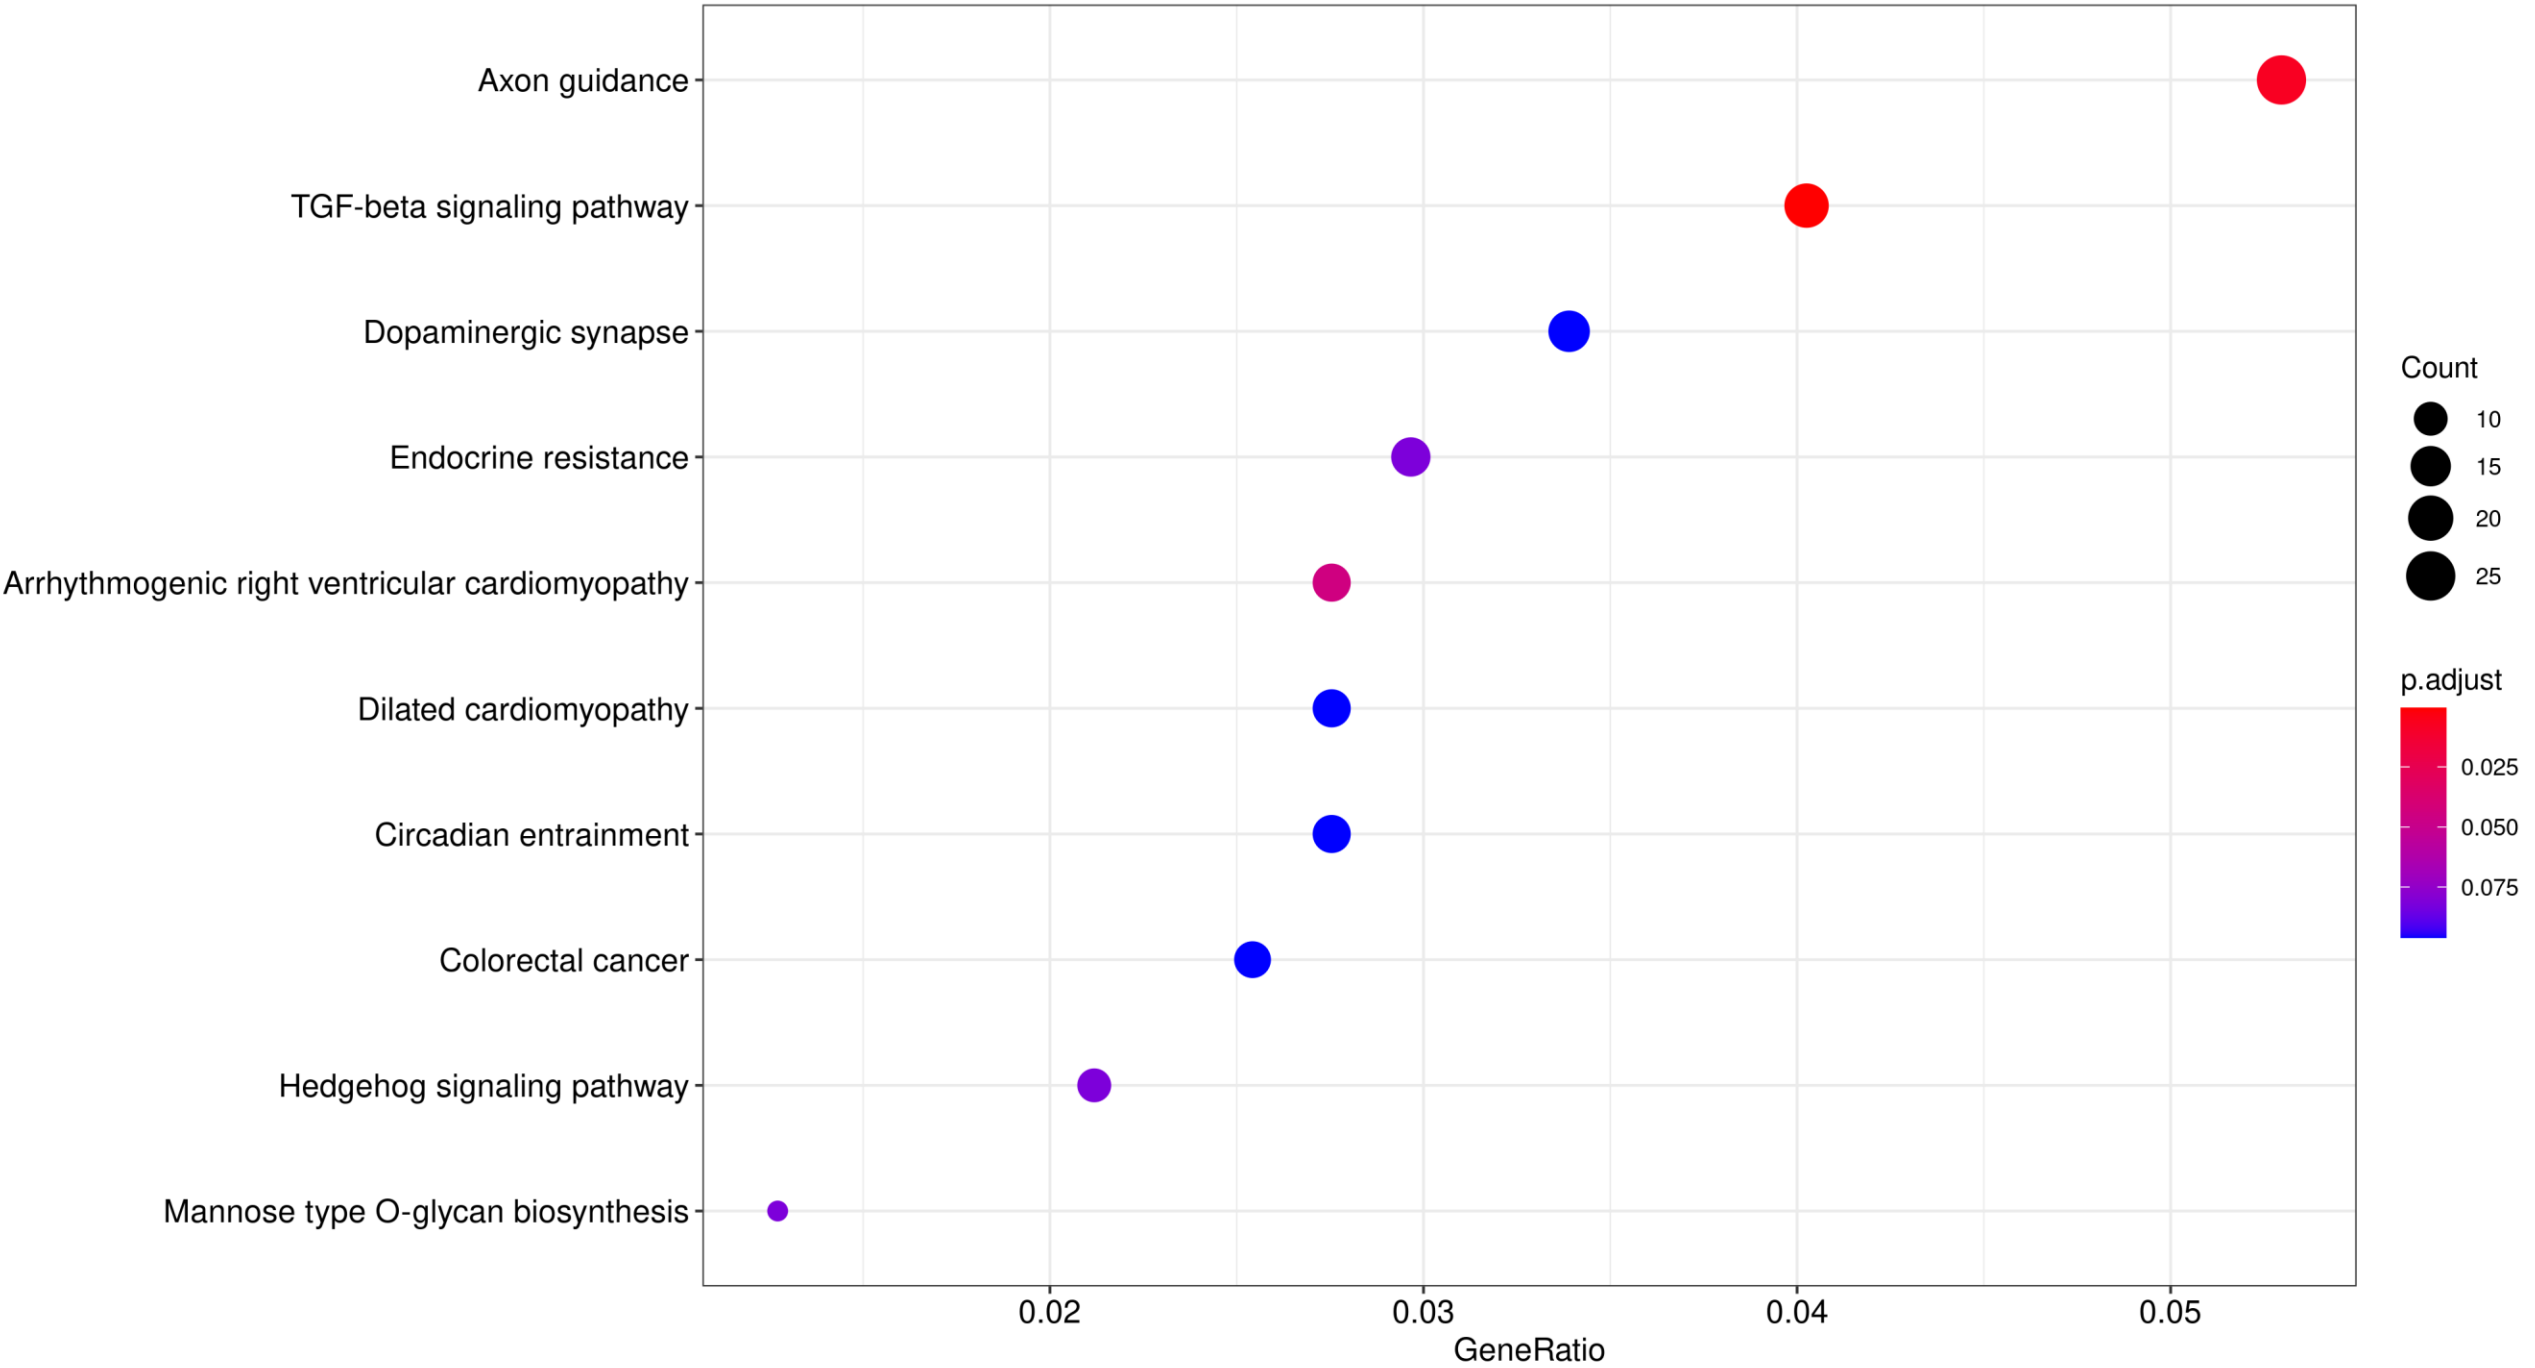

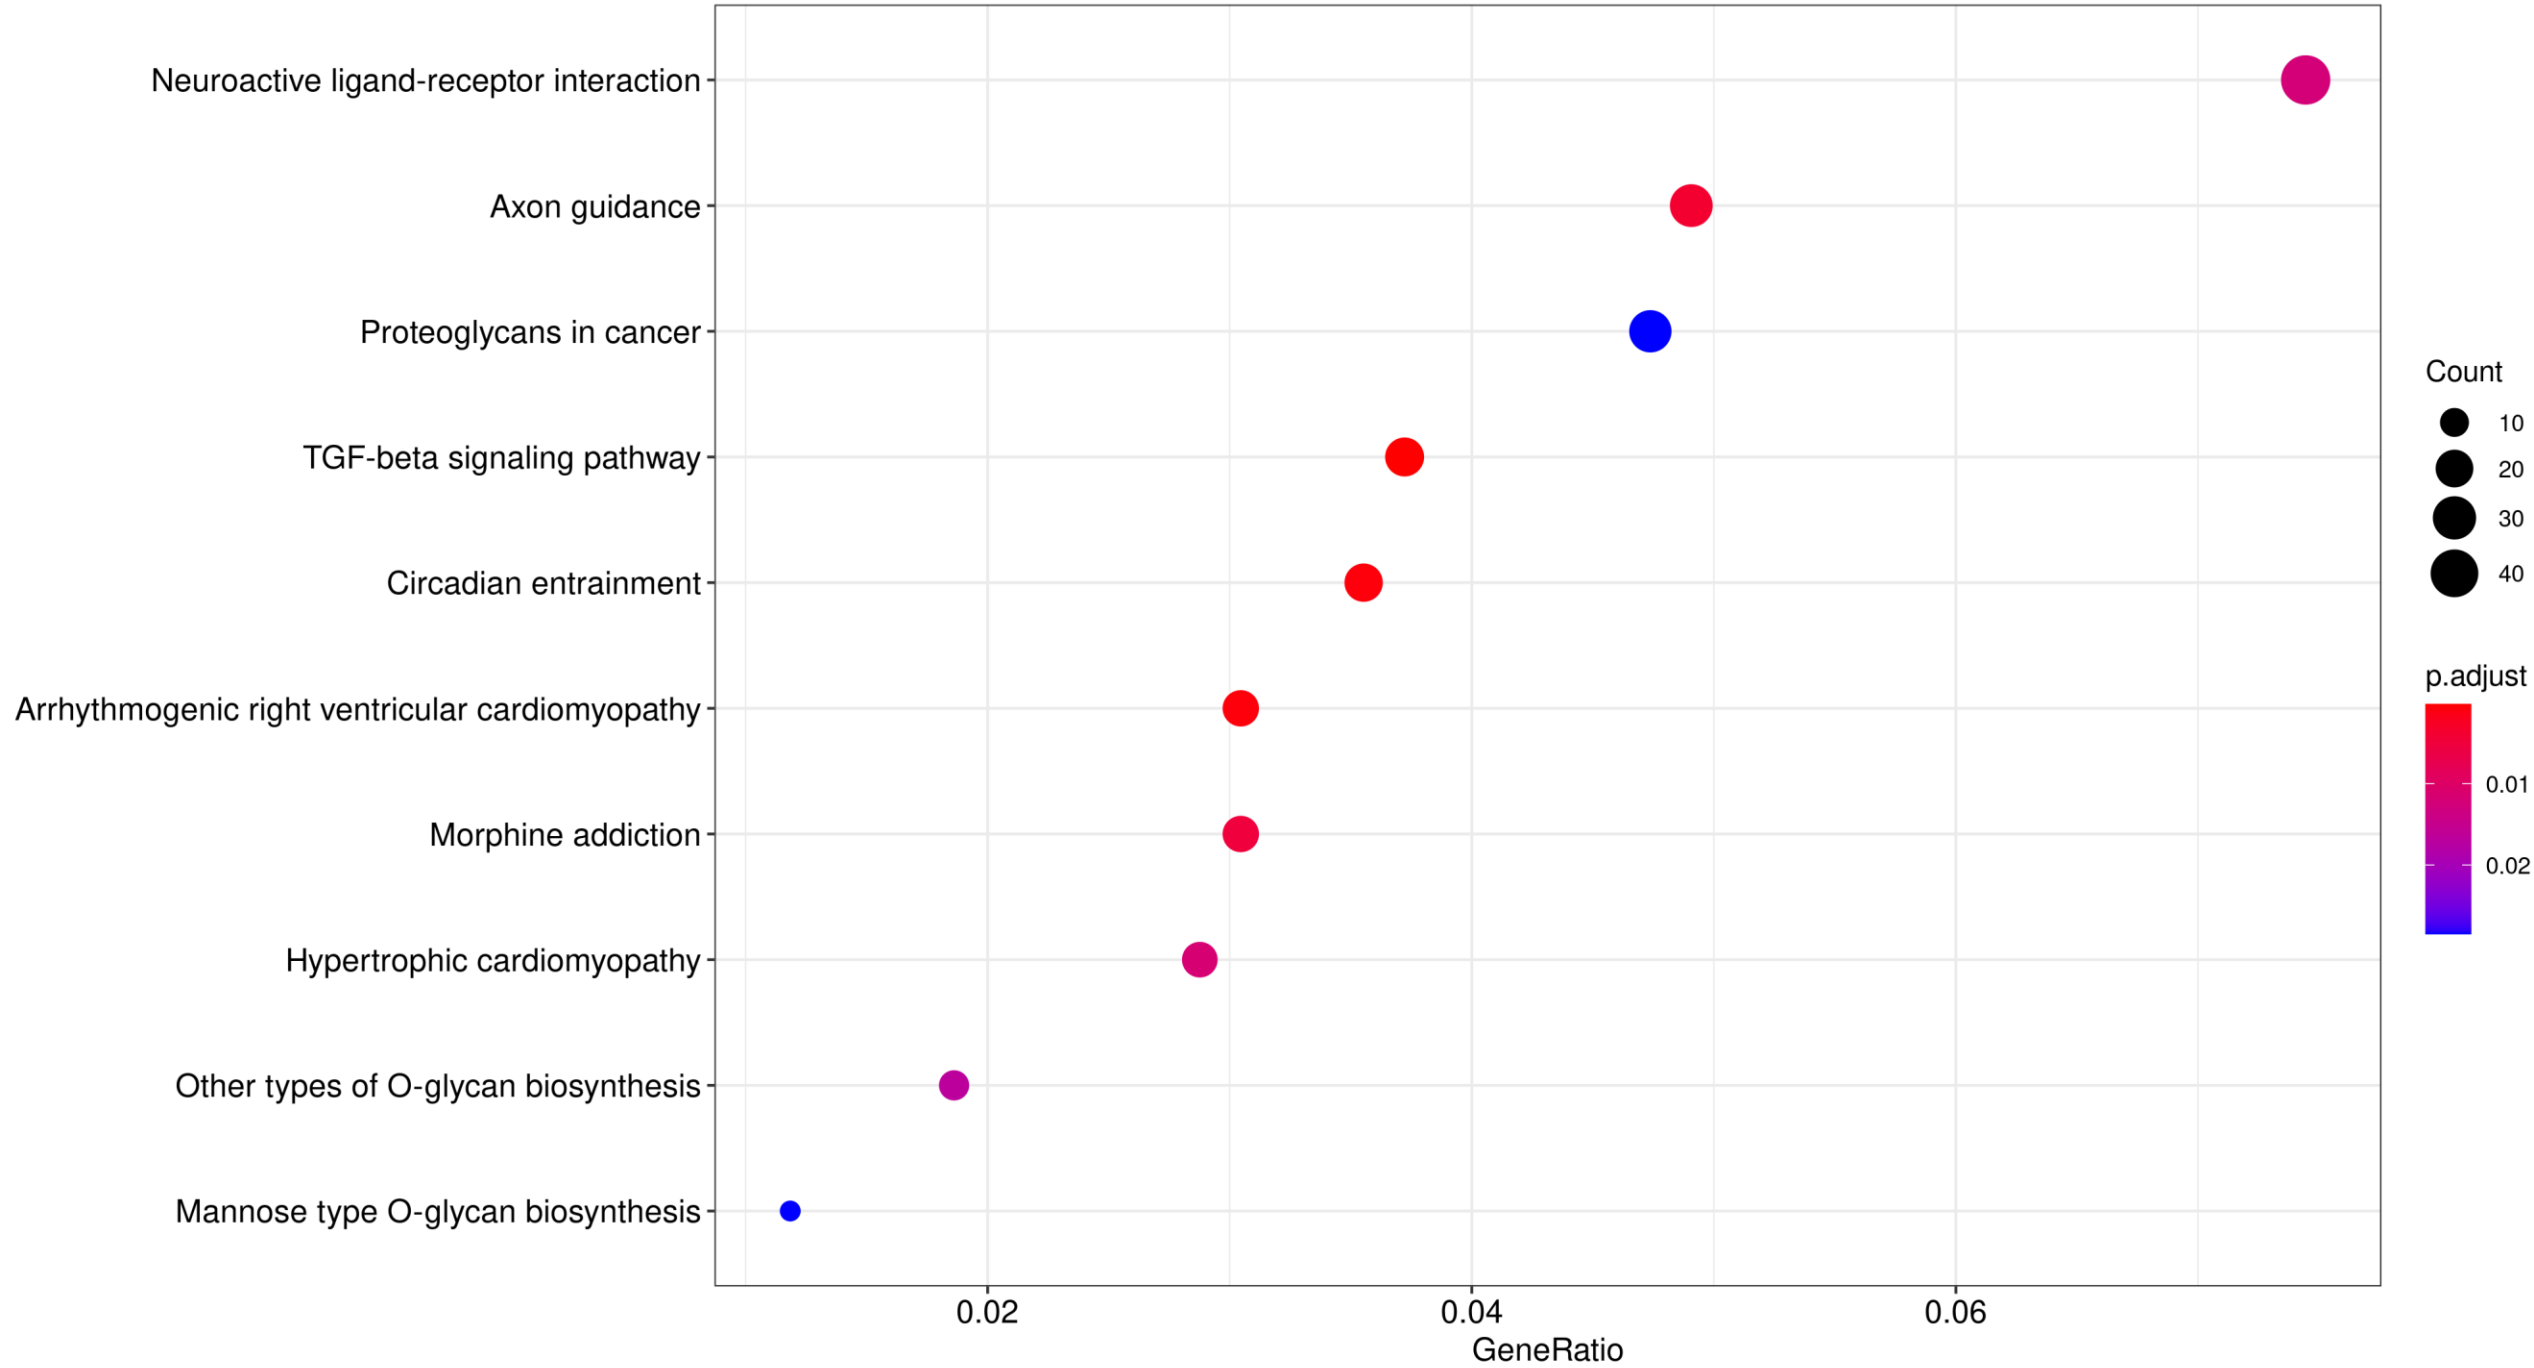

DEG All KEGG Enrichment Pathways Dotplot

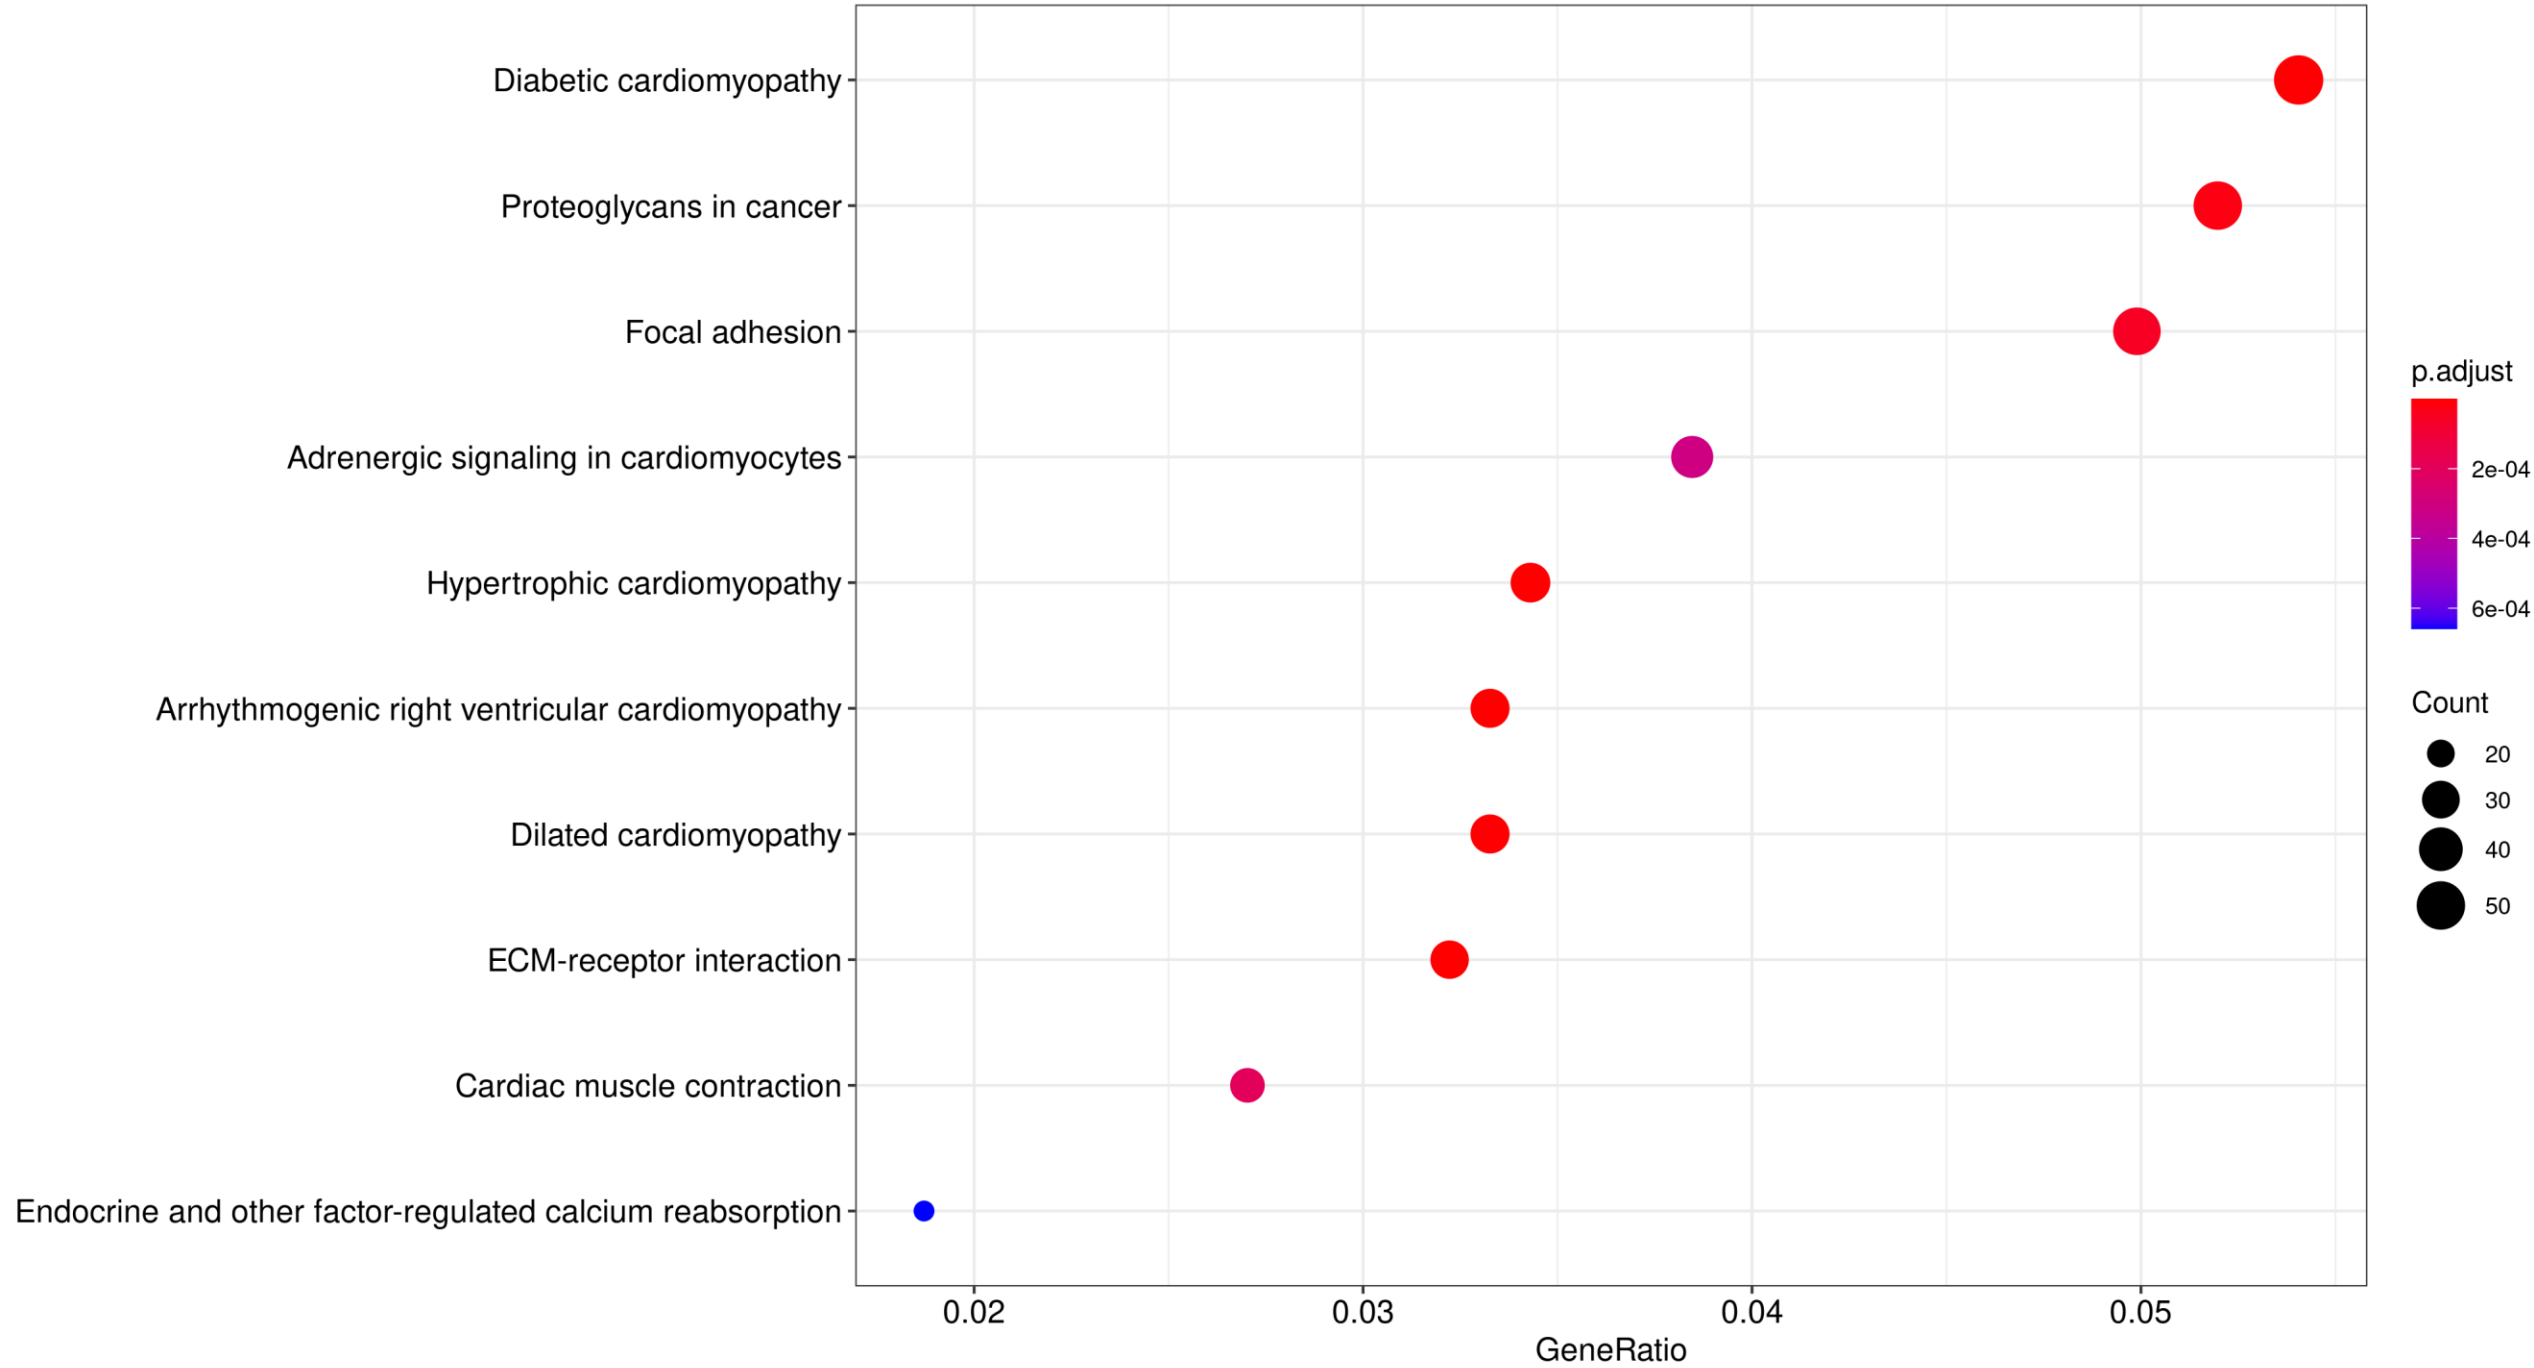

### **Supplementary Figure S3.** KEGG pathway enrichment analysis.
