# Supplementary material
Source: MDPI journal article supplement (https://www.mdpi.com/2674-0583/2/1/4)
Supplement: s1 [file s1]

**Supplementary Table S2.** RNA read summary of the mutant type and WT cell libraries.

| Sample             | Total Reads         | Unmapped            | Total Mapped          | Multiple Mapped      | Uniquely Mapped       | Splice reads (UM)     | Non-splice reads (UM) |
|--------------------|---------------------|---------------------|-----------------------|----------------------|-----------------------|-----------------------|-----------------------|
| WT_1               | 45300938<br>(100 %) | 698319<br>(1.54 %)  | 44602619<br>(98.46 %) | 5766338<br>(12.73 %) | 38836281<br>(85.73 %) | 27356599<br>(60.39 %) | 11479682<br>(25.34 %) |
| WT_2               | 48039146<br>(100 %) | 1129102<br>(2.35 %) | 46910044<br>(97.65 %) | 4257854<br>(8.86 %)  | 42652190<br>(88.79 %) | 30966679<br>(64.46 %) | 11685511<br>(24.32 %) |
| <i>GRIK1</i> -KO_1 | 44908106<br>(100 %) | 559652<br>(1.25 %)  | 44348454<br>(98.75 %) | 5939061<br>(13.22 %) | 38409393<br>(85.53 %) | 24653118<br>(54.9 %)  | 13756275<br>(30.63 %) |
| <i>GRIK1</i> -KO_2 | 45830052<br>(100 %) | 613829<br>(1.34 %)  | 45216223<br>(98.66 %) | 2311768<br>(5.04 %)  | 42904455<br>(93.62 %) | 27258198<br>(59.48 %) | 15646257<br>(34.14 %) |
| <i>GRIK2</i> -KO_1 | 53728068<br>(100 %) | 693263<br>(1.29 %)  | 53034805<br>(98.71 %) | 2824704<br>(5.26 %)  | 50210101<br>(93.45 %) | 31600430<br>(58.82 %) | 18609671<br>(34.64 %) |
| <i>GRIK2</i> -KO_2 | 49807254<br>(100 %) | 654125<br>(1.31 %)  | 49153129<br>(98.69 %) | 4026859<br>(8.08 %)  | 45126270<br>(90.6 %)  | 27914798<br>(56.05 %) | 17211472<br>(34.56 %) |
| <i>GRIK4</i> -KO_1 | 38279594<br>(100 %) | 527404<br>(1.38 %)  | 37752190<br>(98.62 %) | 3179780<br>(8.31 %)  | 34572410<br>(90.32 %) | 23883381<br>(62.39 %) | 10689029<br>(27.92 %) |
| <i>GRIK4</i> -KO_2 | 43909992<br>(100 %) | 562734<br>(1.28 %)  | 43347258<br>(98.72 %) | 3091011<br>(7.04 %)  | 40256247<br>(91.68 %) | 25820982<br>(58.8 %)  | 14435265<br>(32.87 %) |

WT: wild-type; *GRIK1*-KO: *GRIK1*<sup>p.L25Pfs\*?/p.L25Pfs\*?</sup>; *GRIK2*-KO: *GRIK2*<sup>p.L301Ffs\*?/p.L301Ffs\*?</sup>; *GRIK4*-KO: *GRIK4*<sup>p.H343Afs\*?/p.H343Afs\*?</sup>
